# Supplementary material for: Eye Tracking Reveals Impaired Attentional Disengagement Associated with Sensory Response Patterns in Children with Autism
Source: Springer Nature journal article supplement (doi:10.1007/s10803-015-2681-5), 2016-01-27
Supplement: MOESM1 [file 7378698]

## Sheet: updated 11.10.15
Central Fixation Accuracy
Type 3 Analysis of Effects
Effect	DF	Wald	Pr > ChiSq
		Chi-Square
Condition	2	1.4448	0.4856
Group	2	2.754	0.2523
Stimulus	2	1.4127	0.4935
Group*Condition	4	1.1795	0.8815
Stimulus*Condition	4	5.396	0.249
Group*Stimulus	4	6.218	0.1835
Group*Stimulus*Condition	8	10.1611	0.2539
IQ	1	10.5578	0.0012
CA	1	0.1089	0.7414
Variable	Level of Variable 1	Level of Variable 2	Level of Variable 3	Estimate	Standard Error	Wald Chi-Square	Pr > Chi-Square	Odds Ratio
Intercept				2.423	0.6679	13.1601	<.001	11.2791
Condition	Baseline			-0.2144	0.5464	0.1539	0.6948	0.8071
Condition	Gap			0.7029	0.7121	0.9746	0.3235	2.0197
Group	ASD			-0.8862	0.4817	3.3841	0.0658	0.4122
Group	DD			-0.4504	0.5459	0.6805	0.4094	0.6374
Stimulus	Dyn			-0.7117	0.5005	2.0221	0.155	0.4908
Stimulus	Dyn+Aud			0.0595	0.5833	0.0104	0.9188	1.0613
Group*Condition	ASD	Baseline		0.787	0.6497	1.4675	0.2257	2.1968
Group*Condition	ASD	Gap		-0.1316	0.7977	0.0272	0.869	0.8767
Group*Condition	DD	Baseline		-0.1273	0.6718	0.0359	0.8497	0.8805
Group*Condition	DD	Gap		-0.521	0.8373	0.3872	0.5338	0.5939
Stimulus*Condition	Dyn	Baseline		0.8471	0.7245	1.367	0.2423	2.3329
Stimulus*Condition	Dyn	Gap		-0.5662	0.8256	0.4703	0.4929	0.5677
Stimulus*Condition	Dyn+Aud	Baseline		-0.0701	0.7725	0.0082	0.9277	0.9323
Stimulus*Condition	Dyn+Aud	Gap		-0.6602	0.9203	0.5146	0.4731	0.5168
Group*Stimulus	ASD	Dyn		1.8673	0.6539	8.1556	0.0043	6.4707
Group*Stimulus	ASD	Dyn+Aud		0.6852	0.6897	0.9872	0.3204	1.9842
Group*Stimulus	DD	Dyn		1.0555	0.6748	2.447	0.1178	2.8735
Group*Stimulus	DD	Dyn+Aud		-0.3216	0.7047	0.2083	0.6481	0.725
Group*Stimulus*Condition	ASD	Dyn	Baseline	-2.2611	0.914	6.1206	0.0134	0.1042
Group*Stimulus*Condition	ASD	Dyn	Gap	-0.591	1.0067	0.3447	0.5571	0.5537
Group*Stimulus*Condition	ASD	Dyn+Aud	Baseline	-0.4124	0.9491	0.1888	0.6639	0.6621
Group*Stimulus*Condition	ASD	Dyn+Aud	Gap	0.0826	1.0719	0.0059	0.9386	1.0861
Group*Stimulus*Condition	DD	Dyn	Baseline	-1.0311	0.9305	1.2282	0.2678	0.3566
Group*Stimulus*Condition	DD	Dyn	Gap	-0.2858	1.0295	0.077	0.7813	0.7514
Group*Stimulus*Condition	DD	Dyn+Aud	Baseline	0.5267	0.9455	0.3103	0.5775	1.6934
Group*Stimulus*Condition	DD	Dyn+Aud	Gap	0.9894	1.1017	0.8065	0.3692	2.6895
IQ				0.0129	0.00396	10.5578	0.0012	1.013
CA				0.000755	0.00229	0.1089	0.7414	1.0008
Group	Stimulus	Condition	Mean	Std Error of Mean
.	.	Baseline	0.9609	0.003924
.	.	Gap	0.9674	0.003782
.	.	Overlap	0.9641	0.003838
ASD	.	.	0.9649	0.003424
DD	.	.	0.9562	0.006345
TYP	.	.	0.9702	0.004526
.	Dyn	.	0.9608	0.003922
.	Dyn+Aud	.	0.9669	0.003598
.	Static	.	0.9647	0.004041
ASD	.	Baseline	0.9636	0.005704
ASD	.	Gap	0.9654	0.005589
ASD	.	Overlap	0.9656	0.005789
DD	.	Baseline	0.9486	0.009417
DD	.	Gap	0.9598	0.008136
DD	.	Overlap	0.9595	0.008132
TYP	.	Baseline	0.9682	0.007005
TYP	.	Gap	0.975	0.006608
TYP	.	Overlap	0.9668	0.007441
.	Dyn	Baseline	0.9593	0.0069
.	Dyn	Gap	0.954	0.007184
.	Dyn	Overlap	0.9679	0.005944
.	Dyn+Aud	Baseline	0.9643	0.006316
.	Dyn+Aud	Gap	0.9709	0.005706
.	Dyn+Aud	Overlap	0.9652	0.006413
.	Static	Baseline	0.9589	0.006854
.	Static	Gap	0.9741	0.006098
.	Static	Overlap	0.9586	0.007388
ASD	Dyn	.	0.9671	0.005526
ASD	Dyn+Aud	.	0.97	0.005118
ASD	Static	.	0.9562	0.006455
DD	Dyn	.	0.9562	0.00858
DD	Dyn+Aud	.	0.9563	0.008502
DD	Static	.	0.9563	0.008597
TYP	Dyn	.	0.9582	0.008257
TYP	Dyn+Aud	.	0.9725	0.006489
TYP	Static	.	0.9771	0.006242
ASD	Dyn	Baseline	0.9533	0.01089
ASD	Dyn	Gap	0.9635	0.009692
ASD	Dyn	Overlap	0.9793	0.007281
ASD	Dyn+Aud	Baseline	0.9717	0.008478
ASD	Dyn+Aud	Gap	0.969	0.008906
ASD	Dyn+Aud	Overlap	0.9691	0.008854
ASD	Static	Baseline	0.9636	0.009666
ASD	Static	Gap	0.9635	0.01003
ASD	Static	Overlap	0.9372	0.01317
DD	Dyn	Baseline	0.9506	0.01373
DD	Dyn	Gap	0.9433	0.01527
DD	Dyn	Overlap	0.9702	0.01042
DD	Dyn+Aud	Baseline	0.9522	0.0137
DD	Dyn+Aud	Gap	0.9673	0.01089
DD	Dyn+Aud	Overlap	0.9466	0.01439
DD	Static	Baseline	0.9425	0.01512
DD	Static	Gap	0.9651	0.01161
DD	Static	Overlap	0.9584	0.01274
TYP	Dyn	Baseline	0.971	0.01102
TYP	Dyn	Gap	0.9532	0.01421
TYP	Dyn	Overlap	0.9467	0.01493
TYP	Dyn+Aud	Baseline	0.9665	0.01191
TYP	Dyn+Aud	Gap	0.9757	0.009981
TYP	Dyn+Aud	Overlap	0.9746	0.01041
TYP	Static	Baseline	0.9669	0.01178
TYP	Static	Gap	0.9865	0.00781
TYP	Static	Overlap	0.9731	0.01101
Disengagement Accuracy
Type 3 Analysis of Effects
Effect	DF	Wald	Pr > ChiSq
		Chi-Square
Condition	2	629.529	<.001
Group	2	47.352	<.001
Stimulus	2	33.8553	<.001
Group*Condition	4	18.9529	0.0008
Stimulus*Condition	4	38.0833	<.001
Group*Stimulus	4	8.5217	0.0742
Group*Stimulus*Condition	8	9.8769	0.2738
IQ	1	47.8443	<.001
CA	1	156.215	<.001
Variable	Level of Variable 1	Level of Variable 2	Level of Variable 3	Estimate	Standard Error	Wald Chi-Square	Pr > Chi-Square	Odds Ratio
Intercept				-1.9257	0.2434	62.6045	<.001	0.14578
Condition	Baseline			0.8095	0.1763	21.0766	<.001	2.24668
Condition	Gap			1.2011	0.1917	39.2744	<.001	3.32365
Group	ASD			-0.3161	0.1692	3.4909	0.0617	0.72901
Group	DD			0.2335	0.204	1.31	0.2524	1.26299
Stimulus	Dyn			-1.0373	0.1704	37.0719	<.001	0.35441
Stimulus	Dyn+Aud			-1.0193	0.1711	35.4743	<.001	0.36085
Group*Condition	ASD	Baseline		-0.2205	0.2368	0.8675	0.3516	0.80209
Group*Condition	ASD	Gap		-0.0365	0.256	0.0203	0.8867	0.96417
Group*Condition	DD	Baseline		-0.00552	0.281	0.0004	0.9843	0.9945
Group*Condition	DD	Gap		-0.4768	0.2908	2.688	0.1011	0.62078
Stimulus*Condition	Dyn	Baseline		1.0147	0.2501	16.4588	<.001	2.75853
Stimulus*Condition	Dyn	Gap		0.7619	0.2639	8.3336	0.0039	2.1424
Stimulus*Condition	Dyn+Aud	Baseline		1.1143	0.2523	19.5039	<.001	3.04734
Stimulus*Condition	Dyn+Aud	Gap		0.5485	0.26	4.4521	0.0349	1.73068
Group*Stimulus	ASD	Dyn		0.4542	0.2332	3.7937	0.0514	1.57499
Group*Stimulus	ASD	Dyn+Aud		0.4902	0.2332	4.4183	0.0356	1.63269
Group*Stimulus	DD	Dyn		0.3131	0.2643	1.4035	0.2361	1.36766
Group*Stimulus	DD	Dyn+Aud		0.3468	0.2643	1.722	0.1894	1.41459
Group*Stimulus*Condition	ASD	Dyn	Baseline	-0.3681	0.3357	1.2027	0.2728	0.69202
Group*Stimulus*Condition	ASD	Dyn	Gap	-0.3491	0.3539	0.9734	0.3238	0.7053
Group*Stimulus*Condition	ASD	Dyn+Aud	Baseline	-0.5252	0.3368	2.4314	0.1189	0.59144
Group*Stimulus*Condition	ASD	Dyn+Aud	Gap	-0.1355	0.3508	0.1491	0.6994	0.8733
Group*Stimulus*Condition	DD	Dyn	Baseline	-0.5329	0.3923	1.8454	0.1743	0.58692
Group*Stimulus*Condition	DD	Dyn	Gap	-0.3015	0.402	0.5623	0.4534	0.73973
Group*Stimulus*Condition	DD	Dyn+Aud	Baseline	-0.4638	0.3979	1.3587	0.2438	0.62887
Group*Stimulus*Condition	DD	Dyn+Aud	Gap	0.5265	0.4084	1.6621	0.1973	1.69304
IQ				0.0109	0.00158	47.8443	<.001	1.01099
CA				0.012	0.000957	156.215	<.001	1.01204
Group	Stimulus	Condition	Mean	Std Error of Mean
.	.	Baseline	0.7173	0.009261
.	.	Gap	0.7568	0.00885
.	.	Overlap	0.4249	0.01032
ASD	.	.	0.5888	0.009414
DD	.	.	0.6912	0.01473
TYP	.	.	0.6454	0.01287
.	Dyn	.	0.6061	0.01057
.	Dyn+Aud	.	0.6319	0.01061
.	Static	.	0.6884	0.00989
ASD	.	Baseline	0.6332	0.01499
ASD	.	Gap	0.7281	0.01399
ASD	.	Overlap	0.3883	0.01547
DD	.	Baseline	0.7652	0.01855
DD	.	Gap	0.7749	0.01847
DD	.	Overlap	0.5	0.02343
TYP	.	Baseline	0.7438	0.01595
TYP	.	Gap	0.7658	0.01564
TYP	.	Overlap	0.3886	0.01863
.	Dyn	Baseline	0.7051	0.01597
.	Dyn	Gap	0.7307	0.01564
.	Dyn	Overlap	0.3596	0.01675
.	Dyn+Aud	Baseline	0.7277	0.01583
.	Dyn+Aud	Gap	0.7637	0.015
.	Dyn+Aud	Overlap	0.3692	0.0169
.	Static	Baseline	0.7188	0.016
.	Static	Gap	0.7746	0.01494
.	Static	Overlap	0.551	0.01808
ASD	Dyn	.	0.5673	0.01626
ASD	Dyn+Aud	.	0.5758	0.01615
ASD	Static	.	0.6226	0.01596
DD	Dyn	.	0.6376	0.02258
DD	Dyn+Aud	.	0.7064	0.02152
DD	Static	.	0.7261	0.02023
TYP	Dyn	.	0.6124	0.01958
TYP	Dyn+Aud	.	0.6076	0.01949
TYP	Static	.	0.7114	0.01747
ASD	Dyn	Baseline	0.6384	0.02578
ASD	Dyn	Gap	0.7131	0.02427
ASD	Dyn	Overlap	0.3392	0.02533
ASD	Dyn+Aud	Baseline	0.6376	0.02572
ASD	Dyn+Aud	Gap	0.724	0.02386
ASD	Dyn+Aud	Overlap	0.3514	0.0255
ASD	Static	Baseline	0.6236	0.02612
ASD	Static	Gap	0.7466	0.02411
ASD	Static	Overlap	0.479	0.0281
DD	Dyn	Baseline	0.7364	0.03101
DD	Dyn	Gap	0.7163	0.03289
DD	Dyn	Overlap	0.4357	0.03649
DD	Dyn+Aud	Baseline	0.7769	0.0296
DD	Dyn+Aud	Gap	0.831	0.02578
DD	Dyn+Aud	Overlap	0.4485	0.0365
DD	Static	Baseline	0.7807	0.02917
DD	Static	Gap	0.7667	0.03045
DD	Static	Overlap	0.6143	0.03586
TYP	Dyn	Baseline	0.7348	0.02618
TYP	Dyn	Gap	0.7609	0.02547
TYP	Dyn	Overlap	0.3089	0.02698
TYP	Dyn+Aud	Baseline	0.757	0.02536
TYP	Dyn+Aud	Gap	0.7236	0.02622
TYP	Dyn+Aud	Overlap	0.3128	0.02738
TYP	Static	Baseline	0.7392	0.02592
TYP	Static	Gap	0.8074	0.02395
TYP	Static	Overlap	0.5578	0.03077
Peripheral Saccade Accuracy
Type 3 Analysis of Effects
Effect	DF	Wald	Pr > ChiSq
		Chi-Square
Condition	2	489.263	<.001
Group	2	23.8168	<.001
Stimulus	2	39.8665	<.001
Group*Condition	4	7.8776	0.0962
Stimulus*Condition	4	32.2433	<.001
Group*Stimulus	4	4.2167	0.3775
Group*Stimulus*Condition	8	7.2894	0.5058
IQ	1	68.2118	<.001
CA	1	173.054	<.001
Variable	Level of Variable 1	Level of Variable 2	Level of Variable 3	Estimate	Standard Error	Wald Chi-Square	Pr > Chi-Square	Odds Ratio
Intercept				-2.9938	0.2425	152.444	<.001	0.05009
Condition	Baseline			0.6788	0.1696	16.0208	<.001	1.97148
Condition	Gap			1.0085	0.1734	33.8296	<.001	2.74136
Group	ASD			-0.3149	0.1816	3.0075	0.0829	0.72989
Group	DD			0.3279	0.209	2.4618	0.1166	1.38807
Stimulus	Dyn			-0.8679	0.1907	20.7239	<.001	0.41982
Stimulus	Dyn+Aud			-0.7965	0.1898	17.607	<.001	0.45089
Group*Condition	ASD	Baseline		0.1505	0.2386	0.3977	0.5283	1.16239
Group*Condition	ASD	Gap		0.0964	0.2426	0.1578	0.6912	1.10116
Group*Condition	DD	Baseline		0.1261	0.2667	0.2234	0.6364	1.13437
Group*Condition	DD	Gap		-0.4013	0.2691	2.2241	0.1359	0.66943
Stimulus*Condition	Dyn	Baseline		0.9471	0.2515	14.182	<.001	2.57812
Stimulus*Condition	Dyn	Gap		0.6186	0.2548	5.8952	0.0152	1.85632
Stimulus*Condition	Dyn+Aud	Baseline		0.9963	0.2522	15.6079	<.001	2.70833
Stimulus*Condition	Dyn+Aud	Gap		0.4329	0.2547	2.8873	0.0893	1.54167
Group*Stimulus	ASD	Dyn		0.3922	0.2665	2.166	0.1411	1.48017
Group*Stimulus	ASD	Dyn+Aud		0.1836	0.2694	0.4646	0.4955	1.20155
Group*Stimulus	DD	Dyn		-0.0721	0.3007	0.0574	0.8106	0.93047
Group*Stimulus	DD	Dyn+Aud		-0.1259	0.2989	0.1774	0.6736	0.88172
Group*Stimulus*Condition	ASD	Dyn	Baseline	-0.559	0.3495	2.5581	0.1097	0.5718
Group*Stimulus*Condition	ASD	Dyn	Gap	-0.2184	0.3527	0.3833	0.5358	0.80382
Group*Stimulus*Condition	ASD	Dyn+Aud	Baseline	-0.4333	0.3529	1.5076	0.2195	0.64836
Group*Stimulus*Condition	ASD	Dyn+Aud	Gap	0.1163	0.3555	0.107	0.7435	1.12334
Group*Stimulus*Condition	DD	Dyn	Baseline	-0.3749	0.3971	0.8916	0.345	0.68734
Group*Stimulus*Condition	DD	Dyn	Gap	0.0466	0.4012	0.0135	0.9076	1.04767
Group*Stimulus*Condition	DD	Dyn+Aud	Baseline	-0.2457	0.3981	0.381	0.5371	0.78214
Group*Stimulus*Condition	DD	Dyn+Aud	Gap	0.5386	0.3994	1.8182	0.1775	1.71361
IQ				0.0129	0.00156	68.2118	<.001	1.013
CA				0.012	0.000909	173.054	<.001	1.01204
Group	Stimulus	Condition	Mean	Std Error of Mean
.	.	Baseline	0.5156	0.01043
.	.	Gap	0.5334	0.01053
.	.	Overlap	0.2356	0.008955
ASD	.	.	0.3798	0.009482
DD	.	.	0.4596	0.01697
TYP	.	.	0.4187	0.01336
.	Dyn	.	0.3853	0.01075
.	Dyn+Aud	.	0.3993	0.01096
.	Static	.	0.4738	0.0107
ASD	.	Baseline	0.4502	0.01584
ASD	.	Gap	0.5187	0.0161
ASD	.	Overlap	0.2065	0.01288
DD	.	Baseline	0.5706	0.02312
DD	.	Gap	0.5477	0.02354
DD	.	Overlap	0.2766	0.02155
TYP	.	Baseline	0.5258	0.01906
TYP	.	Gap	0.5338	0.01934
TYP	.	Overlap	0.2273	0.01532
.	Dyn	Baseline	0.4953	0.01783
.	Dyn	Gap	0.5107	0.01821
.	Dyn	Overlap	0.1938	0.01398
.	Dyn+Aud	Baseline	0.5248	0.01817
.	Dyn+Aud	Gap	0.5291	0.01811
.	Dyn+Aud	Overlap	0.1913	0.01392
.	Static	Baseline	0.5267	0.01786
.	Static	Gap	0.5603	0.01801
.	Static	Overlap	0.3398	0.01731
ASD	Dyn	.	0.3655	0.01606
ASD	Dyn+Aud	.	0.3587	0.01633
ASD	Static	.	0.4161	0.01642
DD	Dyn	.	0.4019	0.02434
DD	Dyn+Aud	.	0.4456	0.02498
DD	Static	.	0.5325	0.02369
TYP	Dyn	.	0.3888	0.01937
TYP	Dyn+Aud	.	0.395	0.01961
TYP	Static	.	0.4735	0.01946
ASD	Dyn	Baseline	0.4398	0.02724
ASD	Dyn	Gap	0.5115	0.02761
ASD	Dyn	Overlap	0.1886	0.02087
ASD	Dyn+Aud	Baseline	0.4492	0.02753
ASD	Dyn+Aud	Gap	0.5144	0.02771
ASD	Dyn+Aud	Overlap	0.1685	0.02006
ASD	Static	Baseline	0.4615	0.02732
ASD	Static	Gap	0.5303	0.02808
ASD	Static	Overlap	0.2722	0.02519
DD	Dyn	Baseline	0.5241	0.03688
DD	Dyn	Gap	0.4979	0.03836
DD	Dyn	Overlap	0.2174	0.03154
DD	Dyn+Aud	Baseline	0.5726	0.03721
DD	Dyn+Aud	Gap	0.5782	0.03684
DD	Dyn+Aud	Overlap	0.2204	0.03151
DD	Static	Baseline	0.614	0.03568
DD	Static	Gap	0.5662	0.03692
DD	Static	Overlap	0.4156	0.03753
TYP	Dyn	Baseline	0.5223	0.03029
TYP	Dyn	Gap	0.5226	0.03081
TYP	Dyn	Overlap	0.177	0.02173
TYP	Dyn+Aud	Baseline	0.5523	0.03085
TYP	Dyn+Aud	Gap	0.4941	0.03106
TYP	Dyn+Aud	Overlap	0.1877	0.02258
TYP	Static	Baseline	0.5026	0.03025
TYP	Static	Gap	0.5842	0.03067
TYP	Static	Overlap	0.3388	0.02889
Disengagement RT
Source	DF	Sum of Squares	Mean Square	F Value	Pr > F
Model	28	3.71101	0.132536	8.38	<.001
Error	380	6.00897	0.0158131
Corrected Total	408	9.71998
Source	DF	Type III SS	Mean Square	F Value	Pr > F
Condition	2	0.306017	0.153008	9.68	<.001
Group	2	0.0934906	0.0467453	2.96	0.0532
Stimulus	2	2.09347	1.04674	66.19	<.001
Group*Condition	4	0.0221298	0.00553246	0.35	0.8441
Stimulus*Condition	4	0.363031	0.0907577	5.74	<.001
Group*Stimulus	4	0.157154	0.0392884	2.48	0.0433
Group*Stimulus*Condition	8	0.197621	0.0247026	1.56	0.1345
IQ	1	0.058108	0.058108	3.67	0.056
CA	1	0.0682289	0.0682289	4.31	0.0385
Group	Stimulus	Condition	LSMEAN	Standard Error	Pr > |t|
.	.	Baseline	0.417527	0.0110691	<.001
.	.	Gap	0.451068	0.0110412	<.001
.	.	Overlap	0.48623	0.0111658	<.001
ASD	.	.	0.472355	0.0100725	<.001
DD	.	.	0.434932	0.0170224	<.001
TYP	.	.	0.447537	0.0135418	<.001
.	Dyn	.	0.477249	0.0111378	<.001
.	Dyn+Aud	.	0.525459	0.0110691	<.001
.	Static	.	0.352117	0.0110691	<.001
ASD	.	Baseline	0.442423	0.0173351	<.001
ASD	.	Gap	0.465713	0.0171679	<.001
ASD	.	Overlap	0.508928	0.0175013	<.001
DD	.	Baseline	0.386165	0.0246824	<.001
DD	.	Gap	0.443232	0.0246824	<.001
DD	.	Overlap	0.4754	0.0246824	<.001
TYP	.	Baseline	0.423992	0.0197129	<.001
TYP	.	Gap	0.44426	0.0197129	<.001
TYP	.	Overlap	0.47436	0.0200574	<.001
.	Dyn	Baseline	0.443191	0.019036	<.001
.	Dyn	Gap	0.485615	0.019036	<.001
.	Dyn	Overlap	0.502941	0.0195422	<.001
.	Dyn+Aud	Baseline	0.465052	0.019036	<.001
.	Dyn+Aud	Gap	0.572311	0.019036	<.001
.	Dyn+Aud	Overlap	0.539014	0.0191848	<.001
.	Static	Baseline	0.344338	0.0191848	<.001
.	Static	Gap	0.295278	0.019036	<.001
.	Static	Overlap	0.416734	0.019036	<.001
ASD	Dyn	.	0.468072	0.0173351	<.001
ASD	Dyn+Aud	.	0.571212	0.0173351	<.001
ASD	Static	.	0.37778	0.0173351	<.001
DD	Dyn	.	0.470778	0.0246824	<.001
DD	Dyn+Aud	.	0.512693	0.0246824	<.001
DD	Static	.	0.321326	0.0246824	<.001
TYP	Dyn	.	0.492897	0.0200574	<.001
TYP	Dyn+Aud	.	0.492472	0.0197129	<.001
TYP	Static	.	0.357243	0.0197129	<.001
ASD	Dyn	Baseline	0.437702	0.0296716	<.001
ASD	Dyn	Gap	0.494713	0.0296716	<.001
ASD	Dyn	Overlap	0.471801	0.0305324	<.001
ASD	Dyn+Aud	Baseline	0.513623	0.0296716	<.001
ASD	Dyn+Aud	Gap	0.59504	0.0296716	<.001
ASD	Dyn+Aud	Overlap	0.604972	0.0305324	<.001
ASD	Static	Baseline	0.375945	0.0305324	<.001
ASD	Static	Gap	0.307384	0.0296716	<.001
ASD	Static	Overlap	0.450012	0.0296716	<.001
DD	Dyn	Baseline	0.438487	0.0395928	<.001
DD	Dyn	Gap	0.493267	0.0395928	<.001
DD	Dyn	Overlap	0.48058	0.0395928	<.001
DD	Dyn+Aud	Baseline	0.42351	0.0395928	<.001
DD	Dyn+Aud	Gap	0.546726	0.0395928	<.001
DD	Dyn+Aud	Overlap	0.567843	0.0395928	<.001
DD	Static	Baseline	0.296498	0.0395928	<.001
DD	Static	Gap	0.289702	0.0395928	<.001
DD	Static	Overlap	0.377778	0.0395928	<.001
TYP	Dyn	Baseline	0.453384	0.0317603	<.001
TYP	Dyn	Gap	0.468866	0.0317603	<.001
TYP	Dyn	Overlap	0.556442	0.0336589	<.001
TYP	Dyn+Aud	Baseline	0.458022	0.0317603	<.001
TYP	Dyn+Aud	Gap	0.575167	0.0317603	<.001
TYP	Dyn+Aud	Overlap	0.444227	0.0317603	<.001
TYP	Static	Baseline	0.36057	0.0317603	<.001
TYP	Static	Gap	0.288748	0.0317603	<.001
TYP	Static	Overlap	0.422411	0.0317603	<.001
Peripheral Saccade RT
Source	DF	Sum of Squares	Mean Square	F Value	Pr > F
Model	28	2.601	0.0928928	6.25	<.001
Error	370	5.50013	0.0148652
Corrected Total	398	8.10112
Source	DF	Type III SS	Mean Square	F Value	Pr > F
Condition	2	0.389956	0.194978	13.12	<.001
Group	2	0.0635528	0.0317764	2.14	0.1194
Stimulus	2	1.33042	0.665211	44.75	<.001
Group*Condition	4	0.095686	0.0239215	1.61	0.1713
Stimulus*Condition	4	0.398792	0.099698	6.71	<.001
Group*Stimulus	4	0.0748824	0.0187206	1.26	0.2856
Group*Stimulus*Condition	8	0.0576037	0.00720046	0.48	0.8673
IQ	1	0.00080404	0.00080404	0.05	0.8162
CA	1	0.016144	0.016144	1.09	0.298
Group	Stimulus	Condition	LSMean	Standard Error	Pr > |t|
.	.	Baseline	0.47032	0.0107545	<.001
.	.	Gap	0.532623	0.0107277	<.001
.	.	Overlap	0.542084	0.0110816	<.001
ASD	.	.	0.511301	0.00991354	<.001
DD	.	.	0.491728	0.0165218	<.001
TYP	.	.	0.541998	0.0133596	<.001
.	Dyn	.	0.539603	0.0108372	<.001
.	Dyn+Aud	.	0.571634	0.0109121	<.001
.	Static	.	0.433789	0.0108154	<.001
ASD	.	Baseline	0.481576	0.0169625	<.001
ASD	.	Gap	0.539481	0.0168018	<.001
ASD	.	Overlap	0.512845	0.0174831	<.001
DD	.	Baseline	0.423308	0.0239432	<.001
DD	.	Gap	0.506478	0.0239432	<.001
DD	.	Overlap	0.545398	0.0239432	<.001
TYP	.	Baseline	0.506078	0.0191687	<.001
TYP	.	Gap	0.551909	0.0191687	<.001
TYP	.	Overlap	0.568008	0.0203901	<.001
.	Dyn	Baseline	0.501113	0.0184542	<.001
.	Dyn	Gap	0.557858	0.0184542	<.001
.	Dyn	Overlap	0.559838	0.0191577	<.001
.	Dyn+Aud	Baseline	0.480616	0.018598	<.001
.	Dyn+Aud	Gap	0.640004	0.0184542	<.001
.	Dyn+Aud	Overlap	0.594283	0.019464	<.001
.	Static	Baseline	0.429232	0.018598	<.001
.	Static	Gap	0.400006	0.018598	<.001
.	Static	Overlap	0.47213	0.0187656	<.001
ASD	Dyn	.	0.521365	0.0168018	<.001
ASD	Dyn+Aud	.	0.58147	0.0173264	<.001
ASD	Static	.	0.431066	0.0171223	<.001
DD	Dyn	.	0.545098	0.0239432	<.001
DD	Dyn+Aud	.	0.530755	0.0239432	<.001
DD	Static	.	0.399332	0.0239432	<.001
TYP	Dyn	.	0.552346	0.0196595	<.001
TYP	Dyn+Aud	.	0.602678	0.019794	<.001
TYP	Static	.	0.47097	0.0192874	<.001
ASD	Dyn	Baseline	0.489132	0.0287655	<.001
ASD	Dyn	Gap	0.568779	0.0287655	<.001
ASD	Dyn	Overlap	0.506185	0.0295994	<.001
ASD	Dyn+Aud	Baseline	0.515233	0.0295994	<.001
ASD	Dyn+Aud	Gap	0.639592	0.0287655	<.001
ASD	Dyn+Aud	Overlap	0.589585	0.0314897	<.001
ASD	Static	Baseline	0.440362	0.0295994	<.001
ASD	Static	Gap	0.410072	0.0295994	<.001
ASD	Static	Overlap	0.442764	0.0295994	<.001
DD	Dyn	Baseline	0.485063	0.0383953	<.001
DD	Dyn	Gap	0.548176	0.0383953	<.001
DD	Dyn	Overlap	0.602054	0.0383953	<.001
DD	Dyn+Aud	Baseline	0.393304	0.0383953	<.001
DD	Dyn+Aud	Gap	0.613791	0.0383953	<.001
DD	Dyn+Aud	Overlap	0.585169	0.0383953	<.001
DD	Static	Baseline	0.391556	0.0383953	<.001
DD	Static	Gap	0.357468	0.0383953	<.001
DD	Static	Overlap	0.448972	0.0383953	<.001
TYP	Dyn	Baseline	0.529144	0.0308284	<.001
TYP	Dyn	Gap	0.55662	0.0308284	<.001
TYP	Dyn	Overlap	0.571275	0.033668	<.001
TYP	Dyn+Aud	Baseline	0.53331	0.0308284	<.001
TYP	Dyn+Aud	Gap	0.66663	0.0308284	<.001
TYP	Dyn+Aud	Overlap	0.608093	0.033899	<.001
TYP	Static	Baseline	0.455779	0.0308284	<.001
TYP	Static	Gap	0.432477	0.0308284	<.001
TYP	Static	Overlap	0.524655	0.0316328	<.001

## Sheet: original
Central Fixation Accuracy
Type 3 Analysis of Effects
Effect	DF	Wald	Pr > ChiSq
		Chi-Square
o_g_b	2	1.4448	0.4856
Group	2	2.754	0.2523
s_d_da	2	1.4127	0.4935
Group*o_g_b	4	1.1795	0.8815
s_d_da*o_g_b	4	5.396	0.249
Group*s_d_da	4	6.218	0.1835
Group*s_d_da*o_g_b	8	10.1611	0.2539
IQ	1	10.5578	0.0012
CA	1	0.1089	0.7414
Group	s_d_da	o_g_b	Estimate	Standard Error	z Value	Pr > |z|	Mean	Standard Error of Mean
.	.	B	3.2022	0.1045	30.65	<.0001	0.9609	0.003924
.	.	G	3.389	0.1198	28.3	<.0001	0.9674	0.003782
.	.	O	3.2907	0.1109	29.67	<.0001	0.9641	0.003838
AUT	.	.	3.3136	0.1011	32.78	<.0001	0.9649	0.003424
DD	.	.	3.0843	0.1516	20.34	<.0001	0.9562	0.006345
TYP	.	.	3.484	0.1567	22.23	<.0001	0.9702	0.004526
.	D	.	3.1996	0.1042	30.71	<.0001	0.9608	0.003922
.	DA	.	3.3757	0.1125	30	<.0001	0.9669	0.003598
.	S	.	3.3066	0.1185	27.9	<.0001	0.9647	0.004041
AUT	.	B	3.2762	0.1626	20.14	<.0001	0.9636	0.005704
AUT	.	G	3.3288	0.1673	19.89	<.0001	0.9654	0.005589
AUT	.	O	3.3357	0.1744	19.12	<.0001	0.9656	0.005789
DD	.	B	2.9146	0.193	15.1	<.0001	0.9486	0.009417
DD	.	G	3.1731	0.2109	15.05	<.0001	0.9598	0.008136
DD	.	O	3.1654	0.2093	15.12	<.0001	0.9595	0.008132
TYP	.	B	3.4157	0.2275	15.02	<.0001	0.9682	0.007005
TYP	.	G	3.6653	0.2715	13.5	<.0001	0.975	0.006608
TYP	.	O	3.3711	0.2317	14.55	<.0001	0.9668	0.007441
.	D	B	3.1608	0.1769	17.87	<.0001	0.9593	0.0069
.	D	G	3.0325	0.1638	18.51	<.0001	0.954	0.007184
.	D	O	3.4056	0.1912	17.81	<.0001	0.9679	0.005944
.	DA	B	3.2972	0.1836	17.96	<.0001	0.9643	0.006316
.	DA	G	3.5062	0.2017	17.38	<.0001	0.9709	0.005706
.	DA	O	3.3236	0.1911	17.39	<.0001	0.9652	0.006413
.	S	B	3.1485	0.1737	18.13	<.0001	0.9589	0.006854
.	S	G	3.6284	0.2419	15	<.0001	0.9741	0.006098
.	S	O	3.143	0.1863	16.87	<.0001	0.9586	0.007388
AUT	D	.	3.3821	0.1739	19.45	<.0001	0.9671	0.005526
AUT	DA	.	3.4749	0.1757	19.78	<.0001	0.97	0.005118
AUT	S	.	3.0836	0.1542	20	<.0001	0.9562	0.006455
DD	D	.	3.0834	0.2049	15.05	<.0001	0.9562	0.00858
DD	DA	.	3.0847	0.2032	15.18	<.0001	0.9563	0.008502
DD	S	.	3.0849	0.2056	15.01	<.0001	0.9563	0.008597
TYP	D	.	3.1333	0.2064	15.18	<.0001	0.9582	0.008257
TYP	DA	.	3.5674	0.243	14.68	<.0001	0.9725	0.006489
TYP	S	.	3.7514	0.2784	13.47	<.0001	0.9771	0.006242
AUT	D	B	3.0165	0.2447	12.33	<.0001	0.9533	0.01089
AUT	D	G	3.272	0.2753	11.89	<.0001	0.9635	0.009692
AUT	D	O	3.8579	0.3596	10.73	<.0001	0.9793	0.007281
AUT	DA	B	3.5371	0.3086	11.46	<.0001	0.9717	0.008478
AUT	DA	G	3.4408	0.2961	11.62	<.0001	0.969	0.008906
AUT	DA	O	3.447	0.296	11.64	<.0001	0.9691	0.008854
AUT	S	B	3.2749	0.2753	11.9	<.0001	0.9636	0.009666
AUT	S	G	3.2736	0.2854	11.47	<.0001	0.9635	0.01003
AUT	S	O	2.7023	0.2236	12.09	<.0001	0.9372	0.01317
DD	D	B	2.9563	0.2921	10.12	<.0001	0.9506	0.01373
DD	D	G	2.812	0.2856	9.85	<.0001	0.9433	0.01527
DD	D	O	3.482	0.3602	9.67	<.0001	0.9702	0.01042
DD	DA	B	2.9909	0.3007	9.95	<.0001	0.9522	0.0137
DD	DA	G	3.3871	0.3443	9.84	<.0001	0.9673	0.01089
DD	DA	O	2.876	0.285	10.09	<.0001	0.9466	0.01439
DD	S	B	2.7965	0.2789	10.03	<.0001	0.9425	0.01512
DD	S	G	3.3201	0.3448	9.63	<.0001	0.9651	0.01161
DD	S	O	3.1381	0.3197	9.82	<.0001	0.9584	0.01274
TYP	D	B	3.5096	0.3908	8.98	<.0001	0.971	0.01102
TYP	D	G	3.0136	0.3184	9.46	<.0001	0.9532	0.01421
TYP	D	O	2.8768	0.2957	9.73	<.0001	0.9467	0.01493
TYP	DA	B	3.3635	0.3683	9.13	<.0001	0.9665	0.01191
TYP	DA	G	3.6907	0.4202	8.78	<.0001	0.9757	0.009981
TYP	DA	O	3.648	0.4208	8.67	<.0001	0.9746	0.01041
TYP	S	B	3.3741	0.3679	9.17	<.0001	0.9669	0.01178
TYP	S	G	4.2914	0.5864	7.32	<.0001	0.9865	0.00781
TYP	S	O	3.5885	0.4206	8.53	<.0001	0.9731	0.01101
Disengagement Accuracy
Type 3 Analysis of Effects
Effect	DF	Wald	Pr > ChiSq
		Chi-Square
o_g_b	2	629.529	<.0001
Group	2	47.352	<.0001
s_d_da	2	33.8553	<.0001
Group*o_g_b	4	18.9529	0.0008
s_d_da*o_g_b	4	38.0833	<.0001
Group*s_d_da	4	8.5217	0.0742
Group*s_d_da*o_g_b	8	9.8769	0.2738
IQ	1	47.8443	<.0001
CA	1	156.215	<.0001
Group	s_d_da	o_g_b	Estimate	Standard Error	z Value	Pr > |z|	Mean	Standard Error of Mean
.	.	B	0.9311	0.04567	20.39	<.0001	0.7173	0.009261
.	.	G	1.1353	0.04809	23.61	<.0001	0.7568	0.00885
.	.	O	-0.3026	0.04222	-7.17	<.0001	0.4249	0.01032
AUT	.	.	0.3589	0.03888	9.23	<.0001	0.5888	0.009414
DD	.	.	0.8059	0.06901	11.68	<.0001	0.6912	0.01473
TYP	.	.	0.5989	0.05624	10.65	<.0001	0.6454	0.01287
.	D	.	0.4309	0.04429	9.73	<.0001	0.6061	0.01057
.	DA	.	0.5402	0.04559	11.85	<.0001	0.6319	0.01061
.	S	.	0.7926	0.04611	17.19	<.0001	0.6884	0.00989
AUT	.	B	0.5462	0.06456	8.46	<.0001	0.6332	0.01499
AUT	.	G	0.9852	0.07065	13.95	<.0001	0.7281	0.01399
AUT	.	O	-0.4546	0.06513	-6.98	<.0001	0.3883	0.01547
DD	.	B	1.1814	0.1032	11.44	<.0001	0.7652	0.01855
DD	.	G	1.2362	0.1059	11.67	<.0001	0.7749	0.01847
DD	.	O	7.8e-05	0.09372	0	0.9993	0.5	0.02343
TYP	.	B	1.0657	0.08369	12.73	<.0001	0.7438	0.01595
TYP	.	G	1.1845	0.08719	13.59	<.0001	0.7658	0.01564
TYP	.	O	-0.4534	0.0784	-5.78	<.0001	0.3886	0.01863
.	D	B	0.8716	0.07679	11.35	<.0001	0.7051	0.01597
.	D	G	0.9981	0.07947	12.56	<.0001	0.7307	0.01564
.	D	O	-0.5769	0.07273	-7.93	<.0001	0.3596	0.01675
.	DA	B	0.983	0.07988	12.31	<.0001	0.7277	0.01583
.	DA	G	1.1732	0.08313	14.11	<.0001	0.7637	0.015
.	DA	O	-0.5357	0.07255	-7.38	<.0001	0.3692	0.0169
.	S	B	0.9387	0.07917	11.86	<.0001	0.7188	0.016
.	S	G	1.2346	0.08559	14.43	<.0001	0.7746	0.01494
.	S	O	0.2046	0.0731	2.8	0.0051	0.551	0.01808
AUT	D	.	0.2706	0.06625	4.09	<.0001	0.5673	0.01626
AUT	DA	.	0.3055	0.06614	4.62	<.0001	0.5758	0.01615
AUT	S	.	0.5006	0.06793	7.37	<.0001	0.6226	0.01596
DD	D	.	0.5649	0.09773	5.78	<.0001	0.6376	0.02258
DD	DA	.	0.8777	0.1037	8.46	<.0001	0.7064	0.02152
DD	S	.	0.975	0.1017	9.59	<.0001	0.7261	0.02023
TYP	D	.	0.4572	0.08249	5.54	<.0001	0.6124	0.01958
TYP	DA	.	0.4373	0.08176	5.35	<.0001	0.6076	0.01949
TYP	S	.	0.9023	0.08508	10.61	<.0001	0.7114	0.01747
AUT	D	B	0.5685	0.1117	5.09	<.0001	0.6384	0.02578
AUT	D	G	0.9104	0.1186	7.67	<.0001	0.7131	0.02427
AUT	D	O	-0.667	0.113	-5.9	<.0001	0.3392	0.02533
AUT	DA	B	0.565	0.1113	5.08	<.0001	0.6376	0.02572
AUT	DA	G	0.9646	0.1194	8.08	<.0001	0.724	0.02386
AUT	DA	O	-0.613	0.1119	-5.48	<.0001	0.3514	0.0255
AUT	S	B	0.505	0.1113	4.54	<.0001	0.6236	0.02612
AUT	S	G	1.0807	0.1274	8.48	<.0001	0.7466	0.02411
AUT	S	O	-0.08392	0.1126	-0.75	0.4561	0.479	0.0281
DD	D	B	1.0272	0.1597	6.43	<.0001	0.7364	0.03101
DD	D	G	0.9262	0.1619	5.72	<.0001	0.7163	0.03289
DD	D	O	-0.2586	0.1484	-1.74	0.0815	0.4357	0.03649
DD	DA	B	1.2475	0.1708	7.3	<.0001	0.7769	0.0296
DD	DA	G	1.5925	0.1835	8.68	<.0001	0.831	0.02578
DD	DA	O	-0.2068	0.1476	-1.4	0.1611	0.4485	0.0365
DD	S	B	1.2696	0.1704	7.45	<.0001	0.7807	0.02917
DD	S	G	1.1899	0.1703	6.99	<.0001	0.7667	0.03045
DD	S	O	0.4656	0.1514	3.08	0.0021	0.6143	0.03586
TYP	D	B	1.019	0.1343	7.59	<.0001	0.7348	0.02618
TYP	D	G	1.1578	0.14	8.27	<.0001	0.7609	0.02547
TYP	D	O	-0.8051	0.1264	-6.37	<.0001	0.3089	0.02698
TYP	DA	B	1.1366	0.1379	8.24	<.0001	0.757	0.02536
TYP	DA	G	0.9624	0.1311	7.34	<.0001	0.7236	0.02622
TYP	DA	O	-0.7872	0.1274	-6.18	<.0001	0.3128	0.02738
TYP	S	B	1.0416	0.1344	7.75	<.0001	0.7392	0.02592
TYP	S	G	1.4332	0.154	9.31	<.0001	0.8074	0.02395
TYP	S	O	0.2321	0.1247	1.86	0.0627	0.5578	0.03077
Peripheral Saccade Accuracy
Type 3 Analysis of Effects
Effect	DF	Wald	Pr > ChiSq
		Chi-Square
o_g_b	2	489.263	<.0001
Group	2	23.8168	<.0001
s_d_da	2	39.8665	<.0001
Group*o_g_b	4	7.8776	0.0962
s_d_da*o_g_b	4	32.2433	<.0001
Group*s_d_da	4	4.2167	0.3775
Group*s_d_da*o_g_b	8	7.2894	0.5058
IQ	1	68.2118	<.0001
CA	1	173.054	<.0001
Group	s_d_da	o_g_b	Estimate	Standard Error	z Value	Pr > |z|	Mean	Standard Error of Mean
.	.	B	0.06249	0.04175	1.5	0.1344	0.5156	0.01043
.	.	G	0.1339	0.04229	3.17	0.0015	0.5334	0.01053
.	.	O	-1.1771	0.04973	-23.67	<.0001	0.2356	0.008955
AUT	.	.	-0.4905	0.04026	-12.18	<.0001	0.3798	0.009482
DD	.	.	-0.162	0.06831	-2.37	0.0177	0.4596	0.01697
TYP	.	.	-0.3282	0.05487	-5.98	<.0001	0.4187	0.01336
.	D	.	-0.4672	0.04538	-10.29	<.0001	0.3853	0.01075
.	DA	.	-0.4085	0.04571	-8.94	<.0001	0.3993	0.01096
.	S	.	-0.105	0.0429	-2.45	0.0144	0.4738	0.0107
AUT	.	B	-0.2	0.06401	-3.13	0.0018	0.4502	0.01584
AUT	.	G	0.07495	0.06449	1.16	0.2451	0.5187	0.0161
AUT	.	O	-1.3463	0.07859	-17.13	<.0001	0.2065	0.01288
DD	.	B	0.2843	0.09437	3.01	0.0026	0.5706	0.02312
DD	.	G	0.1912	0.09503	2.01	0.0442	0.5477	0.02354
DD	.	O	-0.9615	0.1077	-8.93	<.0001	0.2766	0.02155
TYP	.	B	0.1032	0.07646	1.35	0.1771	0.5258	0.01906
TYP	.	G	0.1355	0.0777	1.74	0.0811	0.5338	0.01934
TYP	.	O	-1.2234	0.08723	-14.02	<.0001	0.2273	0.01532
.	D	B	-0.01872	0.07133	-0.26	0.7929	0.4953	0.01783
.	D	G	0.04267	0.07286	0.59	0.5582	0.5107	0.01821
.	D	O	-1.4255	0.08948	-15.93	<.0001	0.1938	0.01398
.	DA	B	0.09945	0.07286	1.36	0.1723	0.5248	0.01817
.	DA	G	0.1165	0.07269	1.6	0.1091	0.5291	0.01811
.	DA	O	-1.4415	0.09	-16.02	<.0001	0.1913	0.01392
.	S	B	0.1067	0.07165	1.49	0.1363	0.5267	0.01786
.	S	G	0.2426	0.07311	3.32	0.0009	0.5603	0.01801
.	S	O	-0.6642	0.07715	-8.61	<.0001	0.3398	0.01731
AUT	D	.	-0.5517	0.06927	-7.96	<.0001	0.3655	0.01606
AUT	DA	.	-0.5809	0.07097	-8.19	<.0001	0.3587	0.01633
AUT	S	.	-0.3387	0.06758	-5.01	<.0001	0.4161	0.01642
DD	D	.	-0.3976	0.1013	-3.93	<.0001	0.4019	0.02434
DD	DA	.	-0.2184	0.1011	-2.16	0.0308	0.4456	0.02498
DD	S	.	0.13	0.09517	1.37	0.1719	0.5325	0.02369
TYP	D	.	-0.4522	0.08151	-5.55	<.0001	0.3888	0.01937
TYP	DA	.	-0.4263	0.08205	-5.2	<.0001	0.395	0.01961
TYP	S	.	-0.1062	0.07805	-1.36	0.1737	0.4735	0.01946
AUT	D	B	-0.2419	0.1106	-2.19	0.0287	0.4398	0.02724
AUT	D	G	0.04582	0.1105	0.41	0.6783	0.5115	0.02761
AUT	D	O	-1.4592	0.1364	-10.7	<.0001	0.1886	0.02087
AUT	DA	B	-0.2041	0.1113	-1.83	0.0666	0.4492	0.02753
AUT	DA	G	0.05765	0.1109	0.52	0.6033	0.5144	0.02771
AUT	DA	O	-1.5963	0.1432	-11.15	<.0001	0.1685	0.02006
AUT	S	B	-0.1542	0.1099	-1.4	0.1608	0.4615	0.02732
AUT	S	G	0.1214	0.1127	1.08	0.2816	0.5303	0.02808
AUT	S	O	-0.9834	0.1271	-7.74	<.0001	0.2722	0.02519
DD	D	B	0.09635	0.1478	0.65	0.5146	0.5241	0.03688
DD	D	G	-0.00837	0.1534	-0.05	0.9565	0.4979	0.03836
DD	D	O	-1.2807	0.1853	-6.91	<.0001	0.2174	0.03154
DD	DA	B	0.2924	0.152	1.92	0.0544	0.5726	0.03721
DD	DA	G	0.3155	0.151	2.09	0.0367	0.5782	0.03684
DD	DA	O	-1.2631	0.1833	-6.89	<.0001	0.2204	0.03151
DD	S	B	0.4642	0.1505	3.08	0.002	0.614	0.03568
DD	S	G	0.2665	0.1503	1.77	0.0763	0.5662	0.03692
DD	S	O	-0.3407	0.1545	-2.2	0.0275	0.4156	0.03753
TYP	D	B	0.08934	0.1214	0.74	0.4619	0.5223	0.03029
TYP	D	G	0.09054	0.1235	0.73	0.4635	0.5226	0.03081
TYP	D	O	-1.5365	0.1492	-10.3	<.0001	0.177	0.02173
TYP	DA	B	0.21	0.1248	1.68	0.0923	0.5523	0.03085
TYP	DA	G	-0.02378	0.1243	-0.19	0.8482	0.4941	0.03106
TYP	DA	O	-1.4651	0.1481	-9.89	<.0001	0.1877	0.02258
TYP	S	B	0.01021	0.121	0.08	0.9328	0.5026	0.03025
TYP	S	G	0.3399	0.1263	2.69	0.0071	0.5842	0.03067
TYP	S	O	-0.6686	0.129	-5.18	<.0001	0.3388	0.02889
Disengagement RT
Source	DF	Sum of Squares	Mean Square	F Value	Pr > F
Model	28	3.71101	0.132536	8.38	<.0001
Error	380	6.00897	0.0158131
Corrected Total	408	9.71998
Source	DF	Type III SS	Mean Square	F Value	Pr > F
o_g_b	2	0.306017	0.153008	9.68	<.0001
Group	2	0.0934906	0.0467453	2.96	0.0532
s_d_da	2	2.09347	1.04674	66.19	<.0001
Group*o_g_b	4	0.0221298	0.00553246	0.35	0.8441
s_d_da*o_g_b	4	0.363031	0.0907577	5.74	0.0002
Group*s_d_da	4	0.157154	0.0392884	2.48	0.0433
Group*s_d_da*o_g_b	8	0.197621	0.0247026	1.56	0.1345
IQ	1	0.058108	0.058108	3.67	0.056
CA	1	0.0682289	0.0682289	4.31	0.0385
Group	s_d_da	o_g_b	per_time LSMEAN	Standard Error	Pr > |t|
.	.	B	0.417527	0.0110691	<.0001
.	.	G	0.451068	0.0110412	<.0001
.	.	O	0.48623	0.0111658	<.0001
AUT	.	.	0.472355	0.0100725	<.0001
DD	.	.	0.434932	0.0170224	<.0001
TYP	.	.	0.447537	0.0135418	<.0001
.	D	.	0.477249	0.0111378	<.0001
.	DA	.	0.525459	0.0110691	<.0001
.	S	.	0.352117	0.0110691	<.0001
AUT	.	B	0.442423	0.0173351	<.0001
AUT	.	G	0.465713	0.0171679	<.0001
AUT	.	O	0.508928	0.0175013	<.0001
DD	.	B	0.386165	0.0246824	<.0001
DD	.	G	0.443232	0.0246824	<.0001
DD	.	O	0.4754	0.0246824	<.0001
TYP	.	B	0.423992	0.0197129	<.0001
TYP	.	G	0.44426	0.0197129	<.0001
TYP	.	O	0.47436	0.0200574	<.0001
.	D	B	0.443191	0.019036	<.0001
.	D	G	0.485615	0.019036	<.0001
.	D	O	0.502941	0.0195422	<.0001
.	DA	B	0.465052	0.019036	<.0001
.	DA	G	0.572311	0.019036	<.0001
.	DA	O	0.539014	0.0191848	<.0001
.	S	B	0.344338	0.0191848	<.0001
.	S	G	0.295278	0.019036	<.0001
.	S	O	0.416734	0.019036	<.0001
AUT	D	.	0.468072	0.0173351	<.0001
AUT	DA	.	0.571212	0.0173351	<.0001
AUT	S	.	0.37778	0.0173351	<.0001
DD	D	.	0.470778	0.0246824	<.0001
DD	DA	.	0.512693	0.0246824	<.0001
DD	S	.	0.321326	0.0246824	<.0001
TYP	D	.	0.492897	0.0200574	<.0001
TYP	DA	.	0.492472	0.0197129	<.0001
TYP	S	.	0.357243	0.0197129	<.0001
AUT	D	B	0.437702	0.0296716	<.0001
AUT	D	G	0.494713	0.0296716	<.0001
AUT	D	O	0.471801	0.0305324	<.0001
AUT	DA	B	0.513623	0.0296716	<.0001
AUT	DA	G	0.59504	0.0296716	<.0001
AUT	DA	O	0.604972	0.0305324	<.0001
AUT	S	B	0.375945	0.0305324	<.0001
AUT	S	G	0.307384	0.0296716	<.0001
AUT	S	O	0.450012	0.0296716	<.0001
DD	D	B	0.438487	0.0395928	<.0001
DD	D	G	0.493267	0.0395928	<.0001
DD	D	O	0.48058	0.0395928	<.0001
DD	DA	B	0.42351	0.0395928	<.0001
DD	DA	G	0.546726	0.0395928	<.0001
DD	DA	O	0.567843	0.0395928	<.0001
DD	S	B	0.296498	0.0395928	<.0001
DD	S	G	0.289702	0.0395928	<.0001
DD	S	O	0.377778	0.0395928	<.0001
TYP	D	B	0.453384	0.0317603	<.0001
TYP	D	G	0.468866	0.0317603	<.0001
TYP	D	O	0.556442	0.0336589	<.0001
TYP	DA	B	0.458022	0.0317603	<.0001
TYP	DA	G	0.575167	0.0317603	<.0001
TYP	DA	O	0.444227	0.0317603	<.0001
TYP	S	B	0.36057	0.0317603	<.0001
TYP	S	G	0.288748	0.0317603	<.0001
TYP	S	O	0.422411	0.0317603	<.0001
Peripheral Saccade RT
Source	DF	Sum of Squares	Mean Square	F Value	Pr > F
Model	28	2.601	0.0928928	6.25	<.0001
Error	370	5.50013	0.0148652
Corrected Total	398	8.10112
Source	DF	Type III SS	Mean Square	F Value	Pr > F
o_g_b	2	0.389956	0.194978	13.12	<.0001
Group	2	0.0635528	0.0317764	2.14	0.1194
s_d_da	2	1.33042	0.665211	44.75	<.0001
Group*o_g_b	4	0.095686	0.0239215	1.61	0.1713
s_d_da*o_g_b	4	0.398792	0.099698	6.71	<.0001
Group*s_d_da	4	0.0748824	0.0187206	1.26	0.2856
Group*s_d_da*o_g_b	8	0.0576037	0.00720046	0.48	0.8673
IQ	1	0.00080404	0.00080404	0.05	0.8162
CA	1	0.016144	0.016144	1.09	0.298
Group	s_d_da	o_g_b	per_time LSMEAN	Standard Error	Pr > |t|
.	.	B	0.47032	0.0107545	<.0001
.	.	G	0.532623	0.0107277	<.0001
.	.	O	0.542084	0.0110816	<.0001
AUT	.	.	0.511301	0.00991354	<.0001
DD	.	.	0.491728	0.0165218	<.0001
TYP	.	.	0.541998	0.0133596	<.0001
.	D	.	0.539603	0.0108372	<.0001
.	DA	.	0.571634	0.0109121	<.0001
.	S	.	0.433789	0.0108154	<.0001
AUT	.	B	0.481576	0.0169625	<.0001
AUT	.	G	0.539481	0.0168018	<.0001
AUT	.	O	0.512845	0.0174831	<.0001
DD	.	B	0.423308	0.0239432	<.0001
DD	.	G	0.506478	0.0239432	<.0001
DD	.	O	0.545398	0.0239432	<.0001
TYP	.	B	0.506078	0.0191687	<.0001
TYP	.	G	0.551909	0.0191687	<.0001
TYP	.	O	0.568008	0.0203901	<.0001
.	D	B	0.501113	0.0184542	<.0001
.	D	G	0.557858	0.0184542	<.0001
.	D	O	0.559838	0.0191577	<.0001
.	DA	B	0.480616	0.018598	<.0001
.	DA	G	0.640004	0.0184542	<.0001
.	DA	O	0.594283	0.019464	<.0001
.	S	B	0.429232	0.018598	<.0001
.	S	G	0.400006	0.018598	<.0001
.	S	O	0.47213	0.0187656	<.0001
AUT	D	.	0.521365	0.0168018	<.0001
AUT	DA	.	0.58147	0.0173264	<.0001
AUT	S	.	0.431066	0.0171223	<.0001
DD	D	.	0.545098	0.0239432	<.0001
DD	DA	.	0.530755	0.0239432	<.0001
DD	S	.	0.399332	0.0239432	<.0001
TYP	D	.	0.552346	0.0196595	<.0001
TYP	DA	.	0.602678	0.019794	<.0001
TYP	S	.	0.47097	0.0192874	<.0001
AUT	D	B	0.489132	0.0287655	<.0001
AUT	D	G	0.568779	0.0287655	<.0001
AUT	D	O	0.506185	0.0295994	<.0001
AUT	DA	B	0.515233	0.0295994	<.0001
AUT	DA	G	0.639592	0.0287655	<.0001
AUT	DA	O	0.589585	0.0314897	<.0001
AUT	S	B	0.440362	0.0295994	<.0001
AUT	S	G	0.410072	0.0295994	<.0001
AUT	S	O	0.442764	0.0295994	<.0001
DD	D	B	0.485063	0.0383953	<.0001
DD	D	G	0.548176	0.0383953	<.0001
DD	D	O	0.602054	0.0383953	<.0001
DD	DA	B	0.393304	0.0383953	<.0001
DD	DA	G	0.613791	0.0383953	<.0001
DD	DA	O	0.585169	0.0383953	<.0001
DD	S	B	0.391556	0.0383953	<.0001
DD	S	G	0.357468	0.0383953	<.0001
DD	S	O	0.448972	0.0383953	<.0001
TYP	D	B	0.529144	0.0308284	<.0001
TYP	D	G	0.55662	0.0308284	<.0001
TYP	D	O	0.571275	0.033668	<.0001
TYP	DA	B	0.53331	0.0308284	<.0001
TYP	DA	G	0.66663	0.0308284	<.0001
TYP	DA	O	0.608093	0.033899	<.0001
TYP	S	B	0.455779	0.0308284	<.0001
TYP	S	G	0.432477	0.0308284	<.0001
TYP	S	O	0.524655	0.0316328	<.0001
